# Supplementary material for: IATF: An Input-Aware Tuning Framework for Compact BLAS Based on ARMv8 CPUs
Source: Atypon-hosted journal article supplement (doi:10.1145/3545008.3545032), 2022-08-29
Supplement: a66-appendix.pdf [file a66-appendix.pdf]

**APPENDIX**

In the appendix, we show the performance of IATF in NT, TN, and TT modes of GEMM compared with ARMPL, LIBXSMM, and OpenBLAS, and the performance of TRSM in LNUN, LTLN, LTUN, RNLN, RNUN, RTLN, and RTUN modes compared with ARMPL and OpenBLAS. The performance of GEMM in NN mode and TRSM

in LNLN mode has been shown in the main text. The results show that the IATF significantly improves performance in all modes.

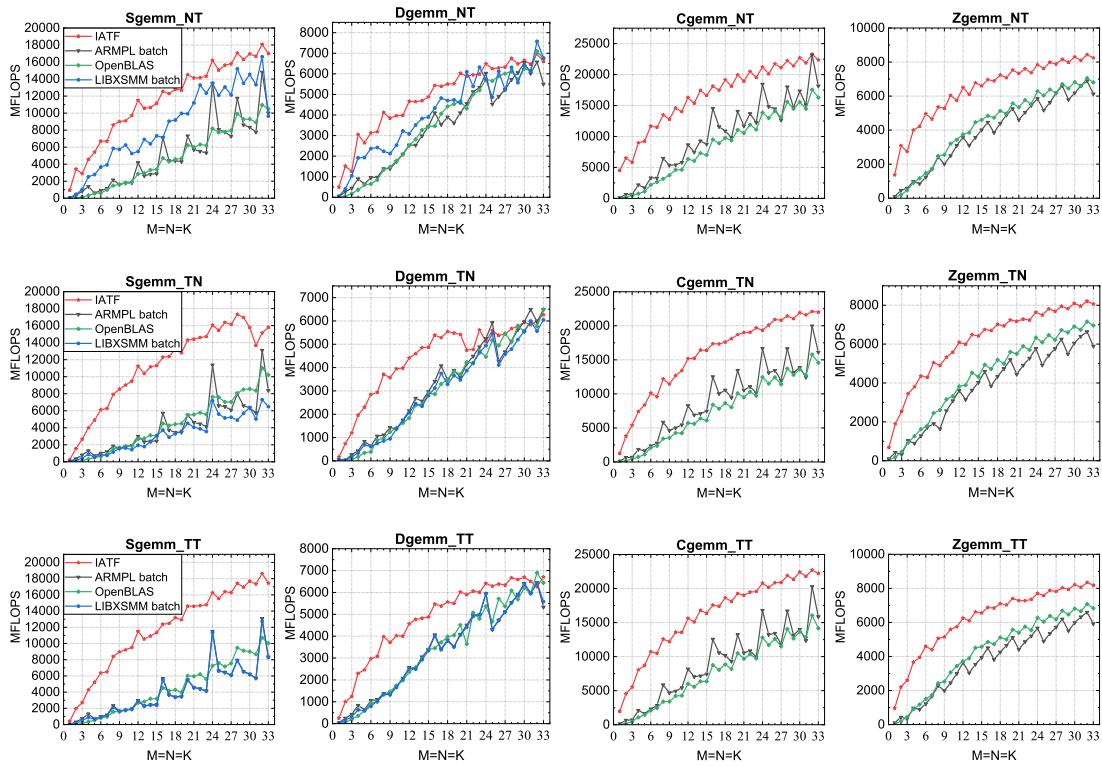

**Figure 13: Performance of compact GEMM under the NT, TN, and TT modes.**

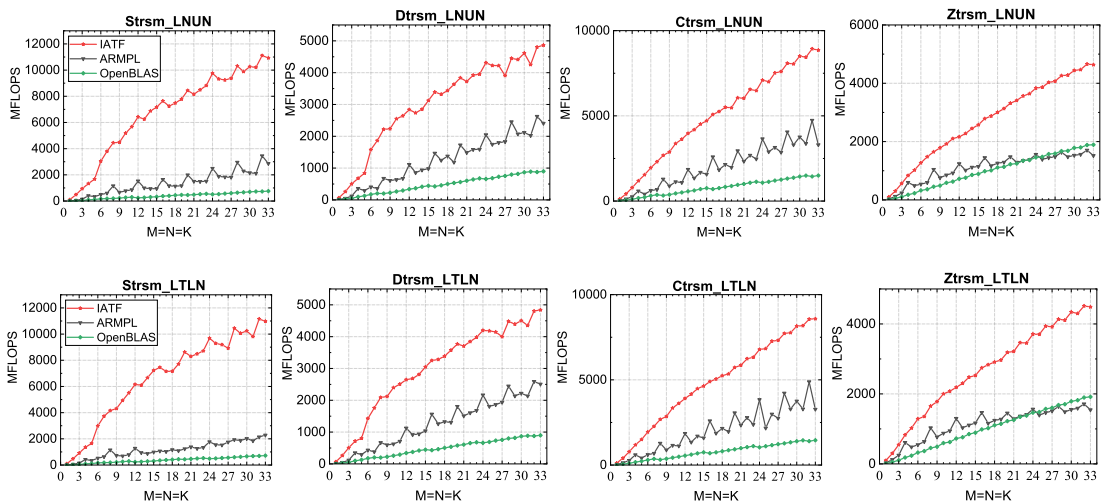

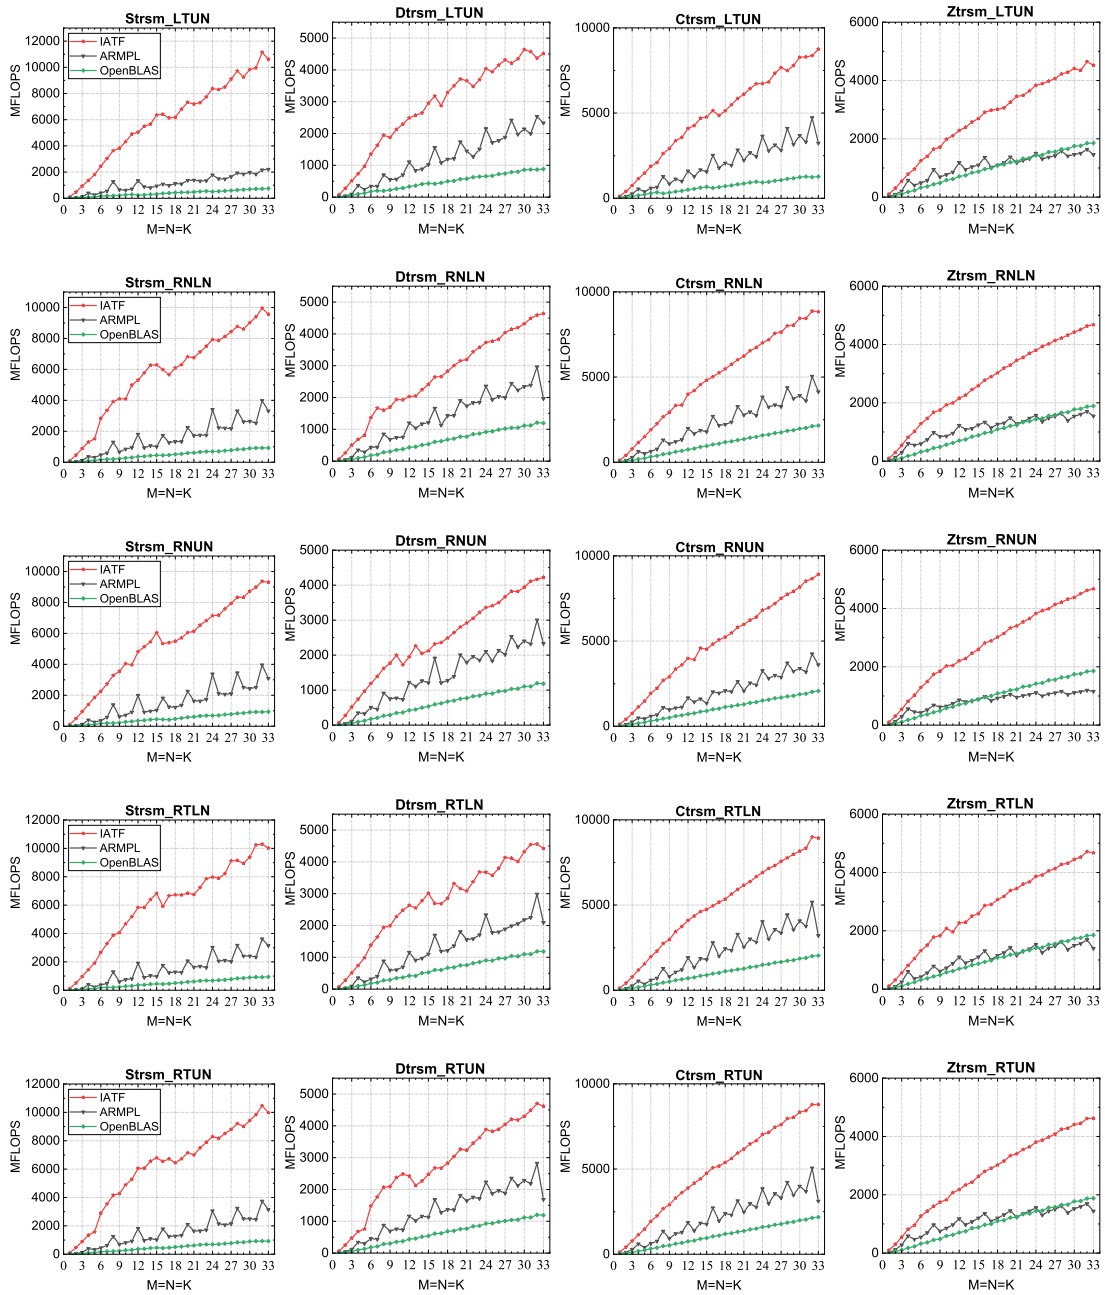

Figure 14: Performance of compact TRSM under the LNUN, LTLN, LTUN, RNLN, RNUN, RTLN, and RTUN modes.
